# Supplementary material for: Rotors of BOSCHIBAs as endoplasmic reticulum fluorescent probes in HeLa and human umbilical vein endothelial cells
Source: Royal Society of Chemistry journal article supplement (doi:10.1039/d2nj04932e), 2023-01-01
Supplement: d2nj04932e1.pdf [file d2nj04932e1.pdf]

## Electronic Supplementary Information for

Molecular Rotors of BOSCHIBAs as Endoplasmic Reticulum fluorescent probe in HeLa and human umbilical vein endothelial cells

Margarita López-Espejel,<sup>a</sup> Marisol Ibarra-Rodríguez,<sup>a\*</sup> Blanca M. Muñoz-Flores,<sup>a</sup> Marcos R. Bahena-Villareal,<sup>a</sup> Azael A. Cavazos-Jaramillo,<sup>b</sup> Monica D. Garza-Villegas,<sup>b</sup> Cristina Rodríguez-Padilla,<sup>b</sup> Itza E. Luna-Cruz,<sup>b</sup> H. V. Rasika Dias,<sup>c</sup> Juan M. Alcocer-González,<sup>b</sup> and Víctor M. Jiménez-Pérez.<sup>\*a</sup>

[a] Universidad Autónoma de Nuevo León, Facultad de Ciencias Químicas, Ciudad Universitaria, Av. Universidad s/n, C.P. 66451, Nuevo León, México.

[b] Universidad Autónoma de Nuevo León, Facultad de Ciencias Biológicas, Ciudad Universitaria, Av. Universidad s/n, C.P. 66451, Nuevo León, México.

[c] Department of Chemistry and Biochemistry, The University of Texas at Arlington, Arlington, TX 76019-0065, USA

\*E-mail: (Víctor M. Jiménez-Pérez) victor.jimenezpr@uanl.edu.mx, (Marisol Ibarra-Rodríguez) mibarod\_22@hotmail.com

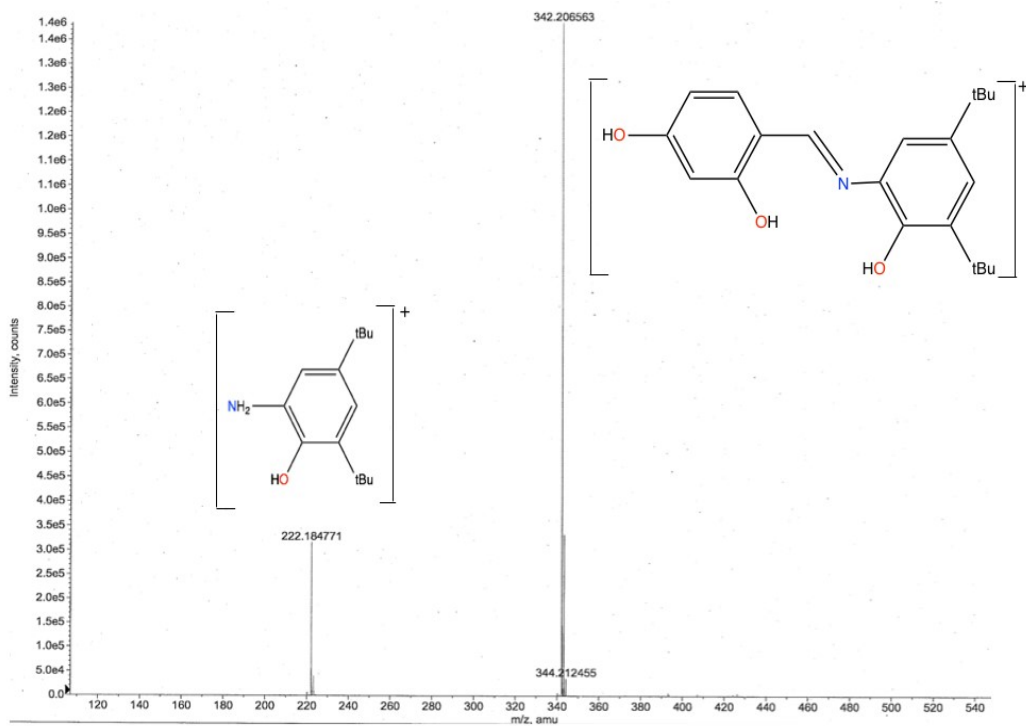

**Figure S1.** High resolution mass spectrum of **1**.

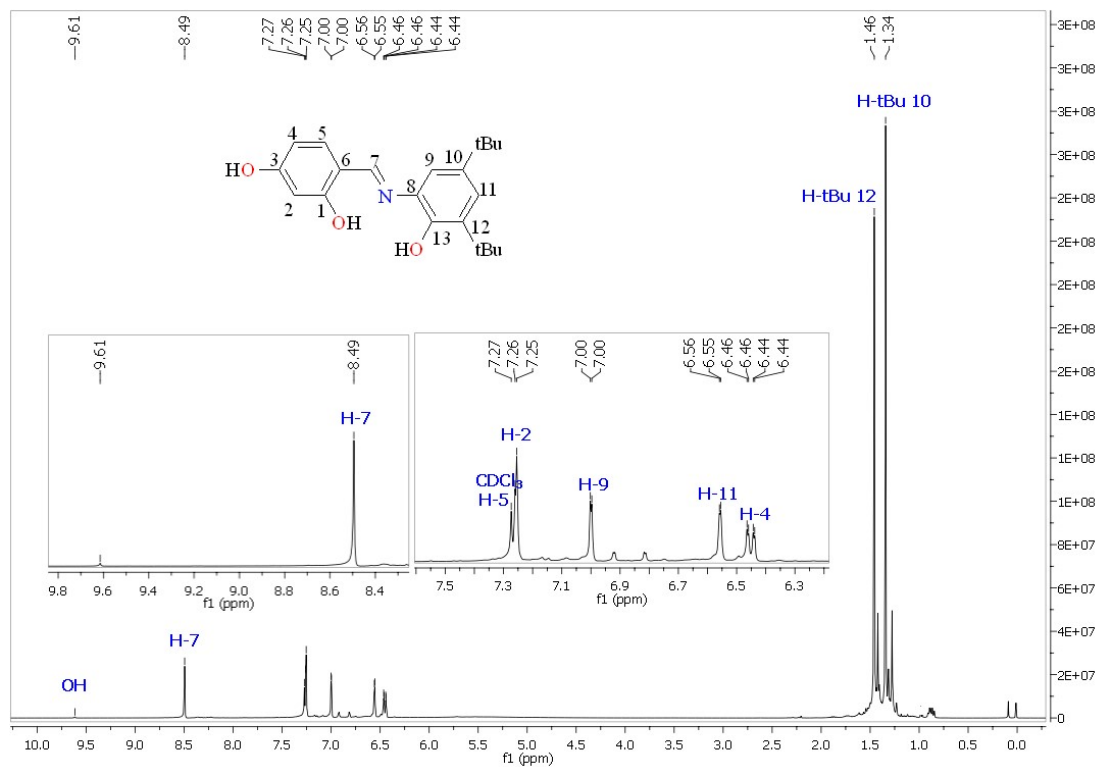

**Figure S2.**  $^1\text{H}$  NMR (400 MHz,  $\text{CDCl}_3$ ) spectrum of **1**.

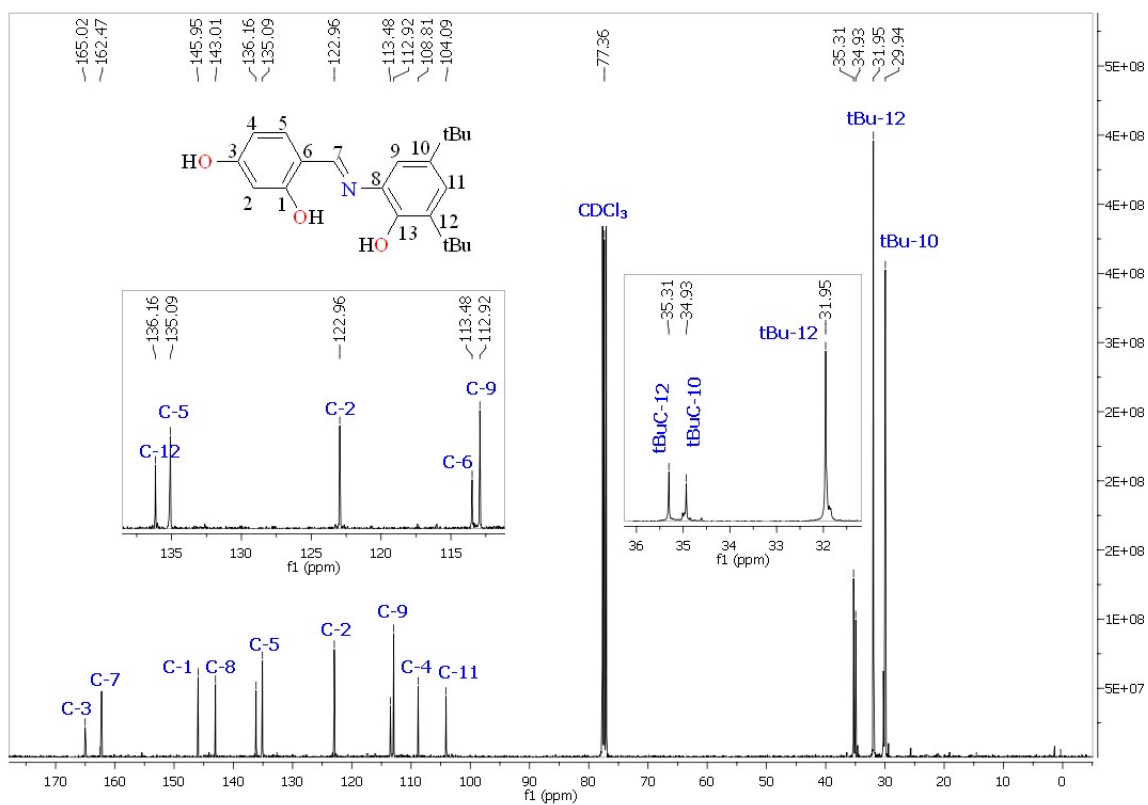

**Figure S3.** <sup>13</sup>C NMR (CDCl<sub>3</sub>) spectrum of 1.

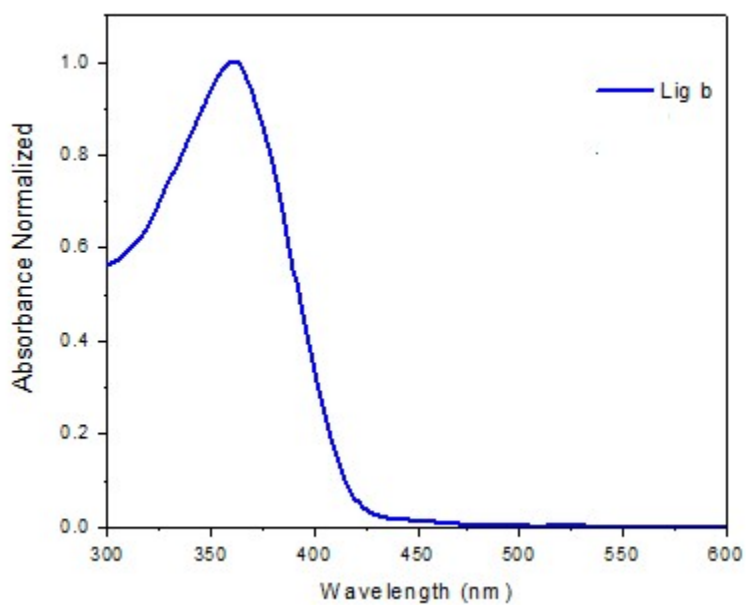

**Figure S4.** Absorbance of 1 in CHCl<sub>3</sub>.

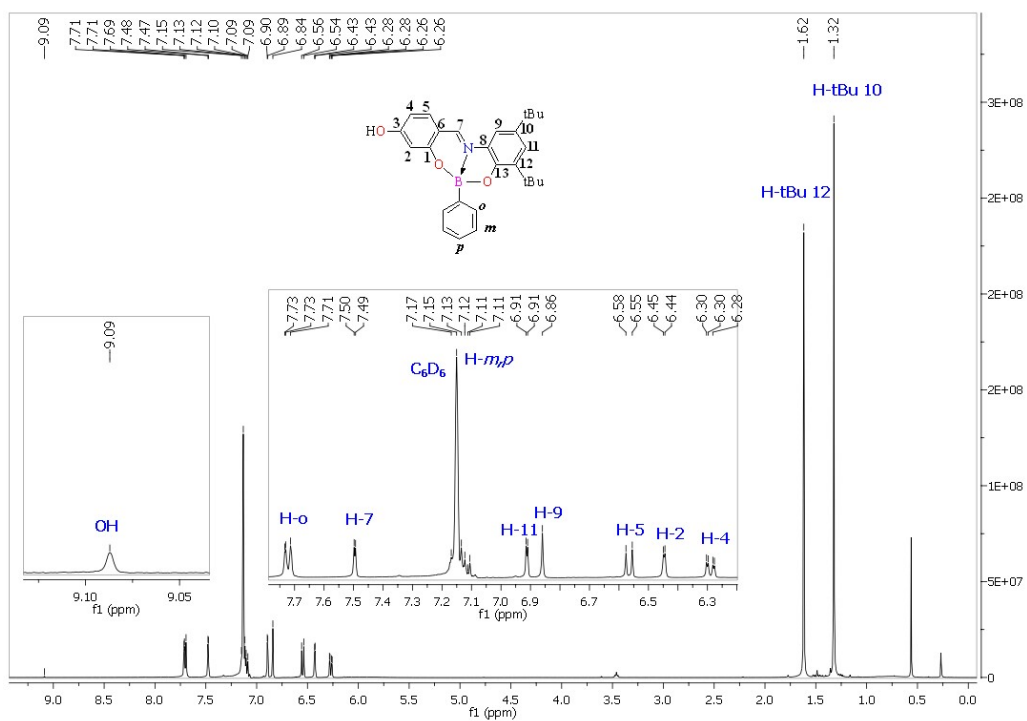

Figure S5.  $^1\text{H}$  NMR ( $\text{C}_6\text{D}_6$ ) spectrum of **2**.

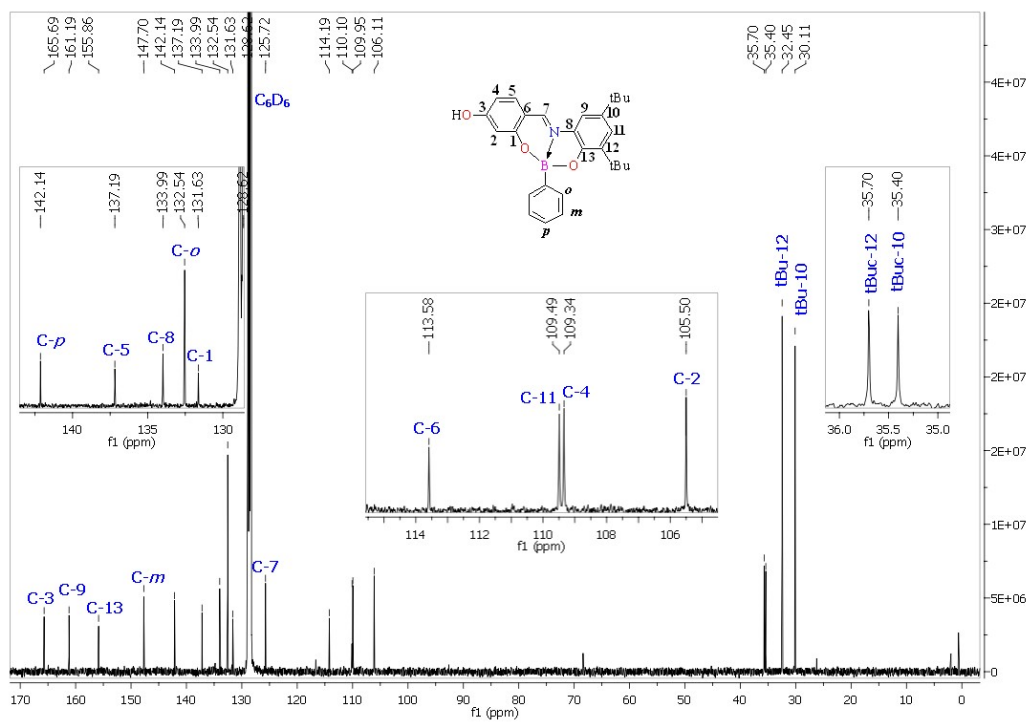

Figure S6.  $^{13}\text{C}$  NMR ( $\text{C}_6\text{D}_6$ ) spectrum of **2**.

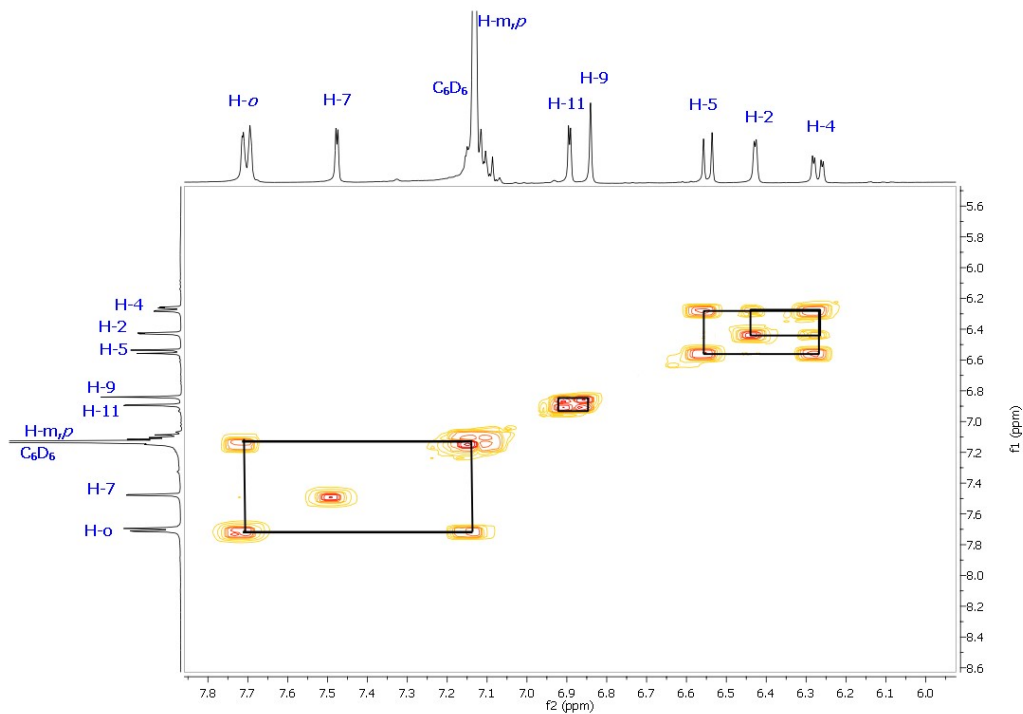

Figure S7. COSY spectra in  $C_6D_6$  of **2**.

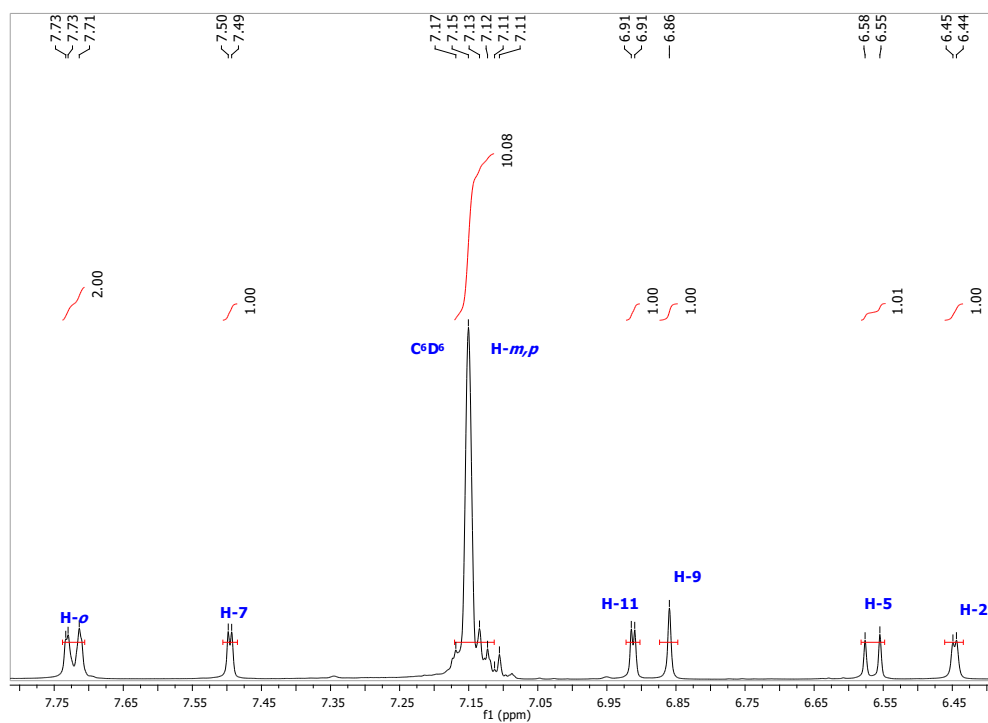

Figure S8. Integration spectra in  $C_6D_6$  of **2**.

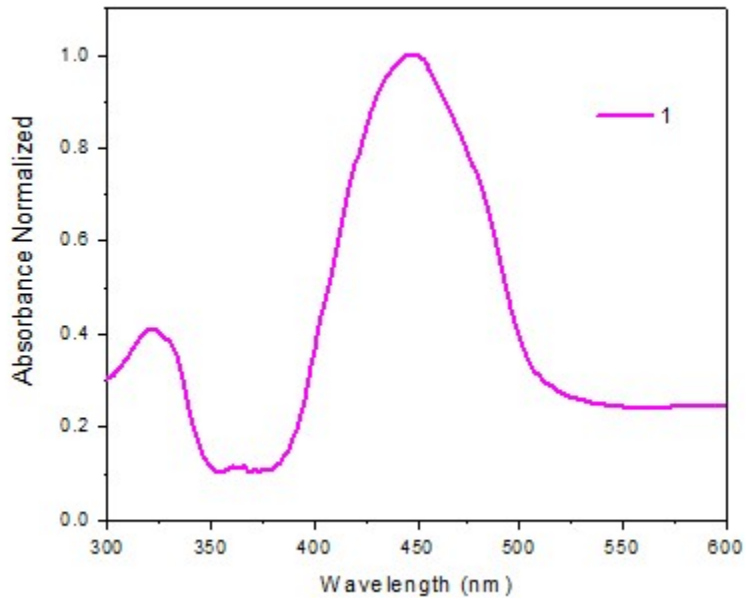

**Figure S9.** Absorbance of **2** in  $\text{CHCl}_3$ .

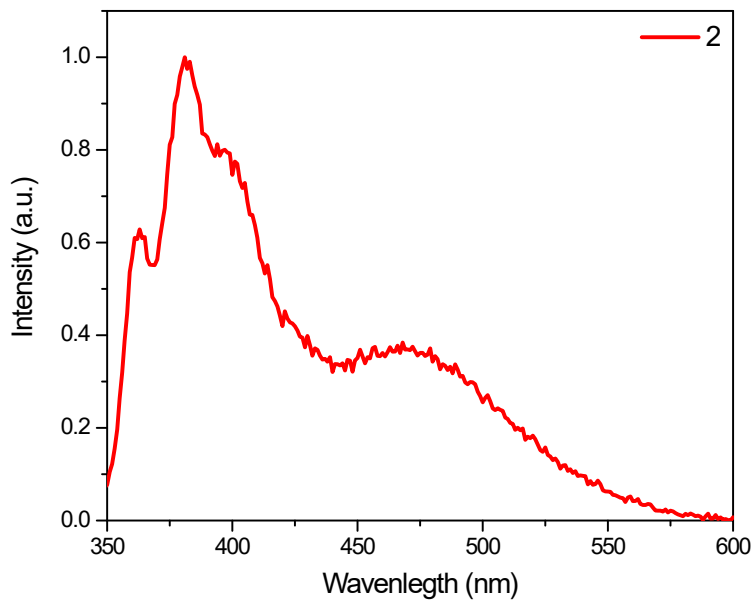

**Figure S10.** Emission of **2** in  $\text{CHCl}_3$ .

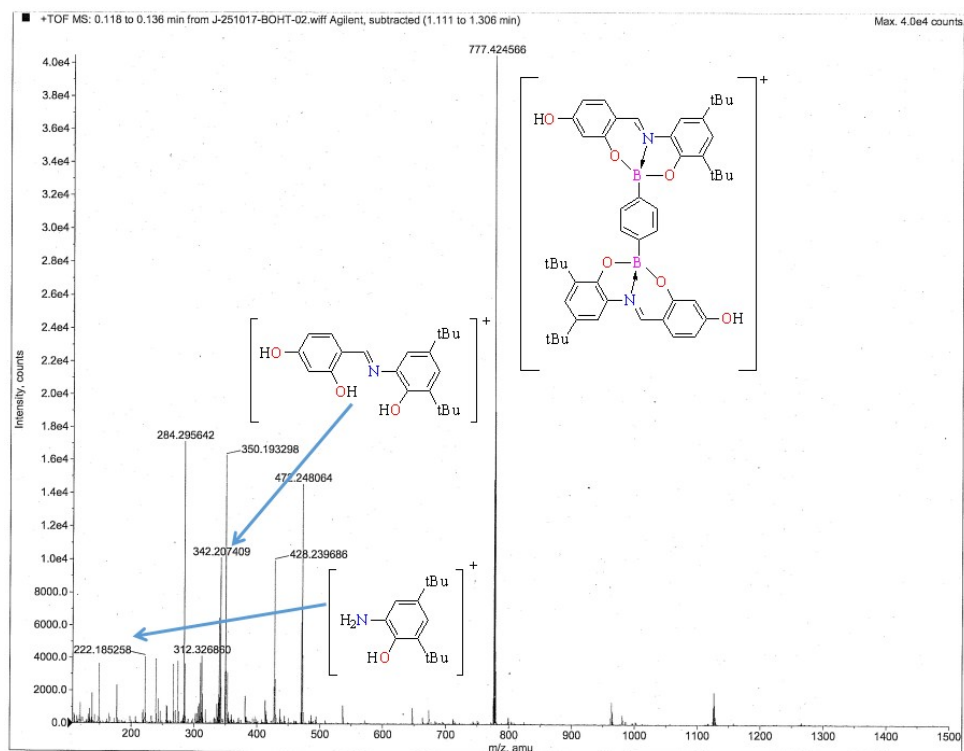

**Figure S11.** High resolution mass spectrum of **3**.

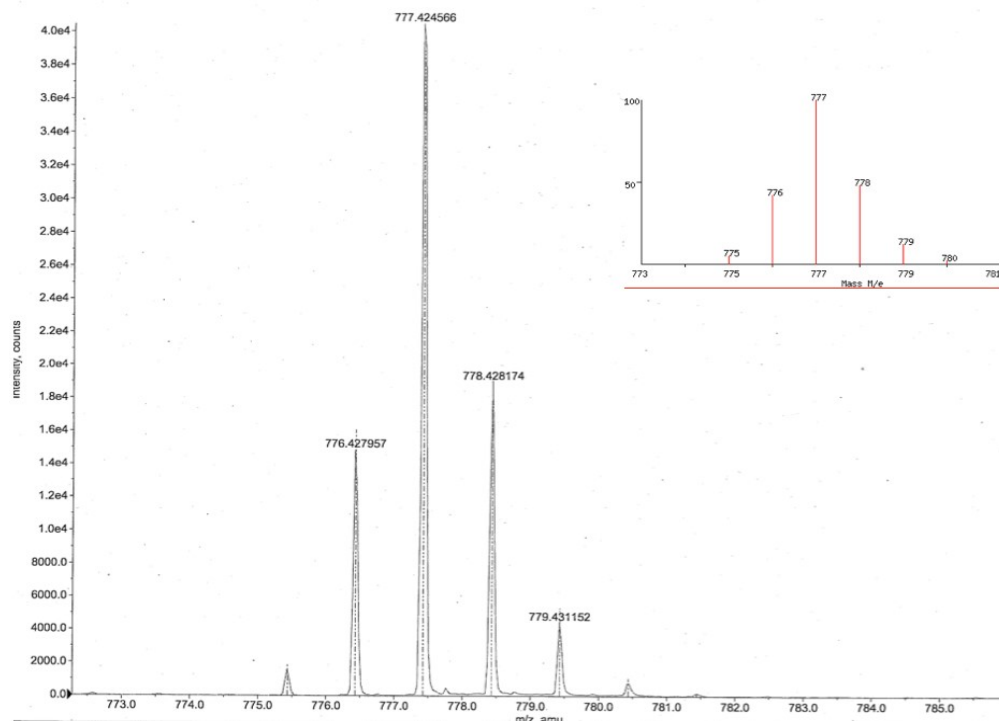

**Figure S12.** Comparison of theoretical and experimental isotopic distributions of spectra of the  $[M+H]^+$  of compound **3**, the spectrum clearly indicates the presence of two boron atoms.

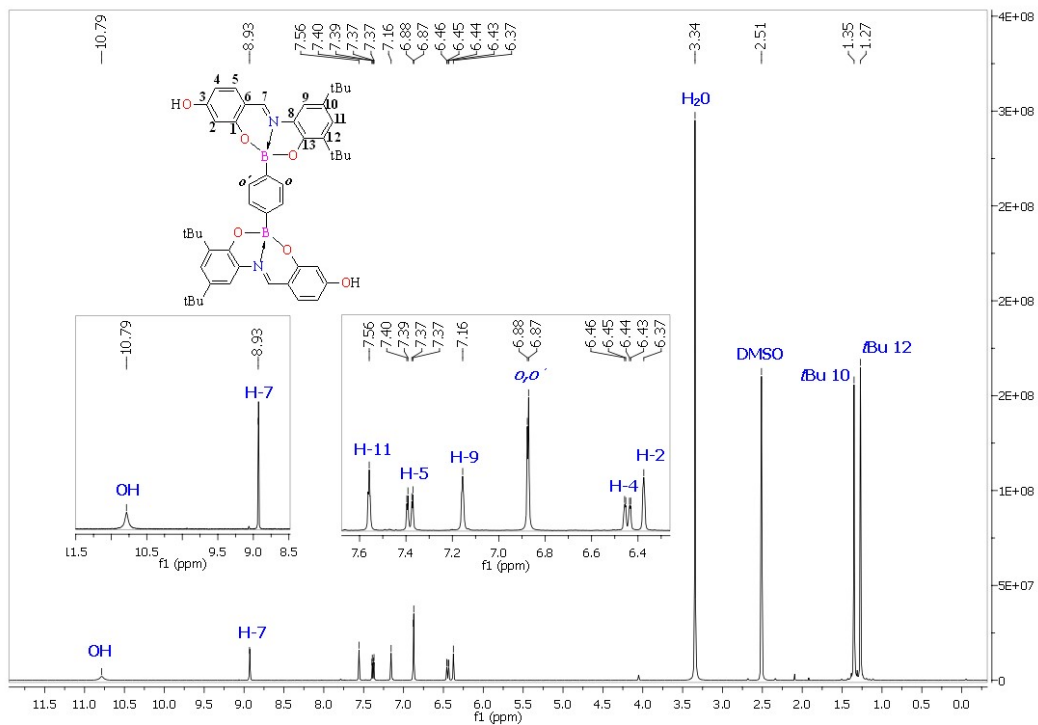

Figure S13.  $^1\text{H}$  NMR ( $\text{DMSO}-d_6$ ) spectrum of **3**.

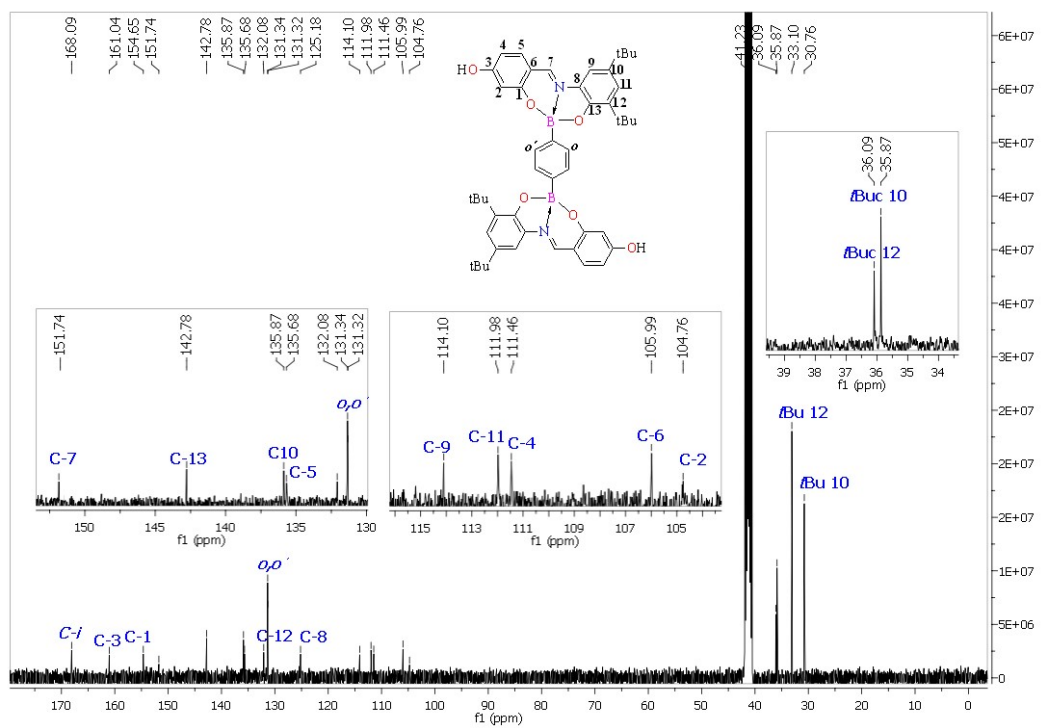

Figure S14.  $^{13}\text{C}$  NMR ( $\text{DMSO}-d_6$ ) spectrum of **3**.



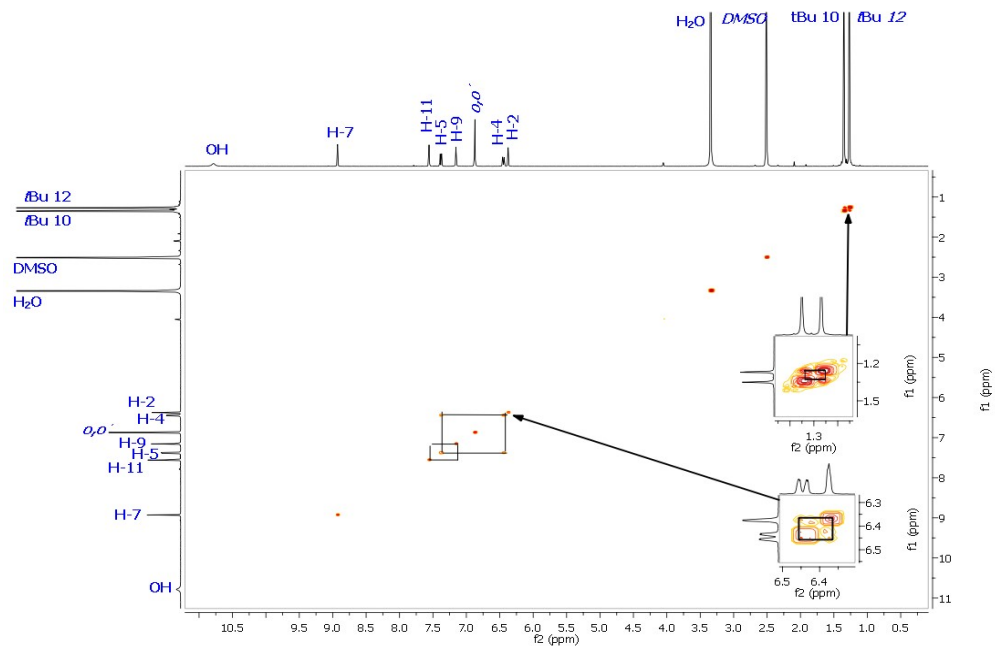

Figure S15. COSY spectra in DMSO- $d_6$  of **3**.

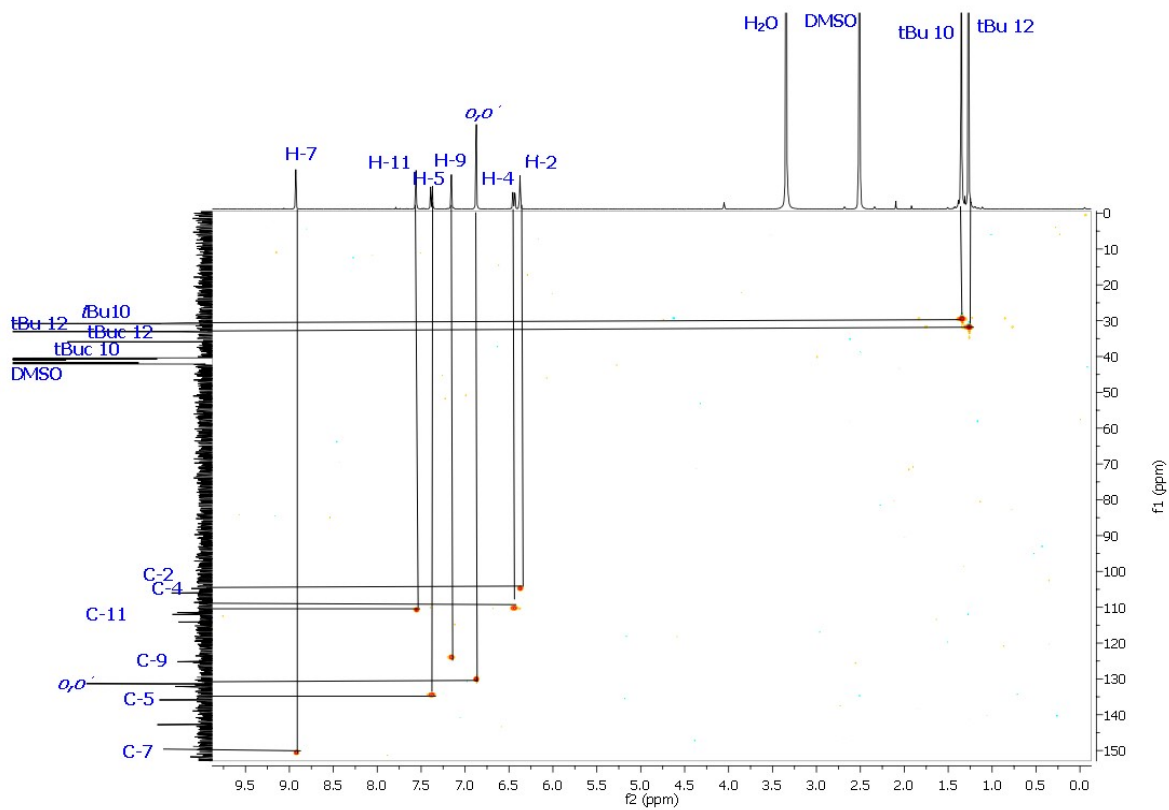

Figure S16. HSQC spectra in DMSO- $d_6$  of **3**.

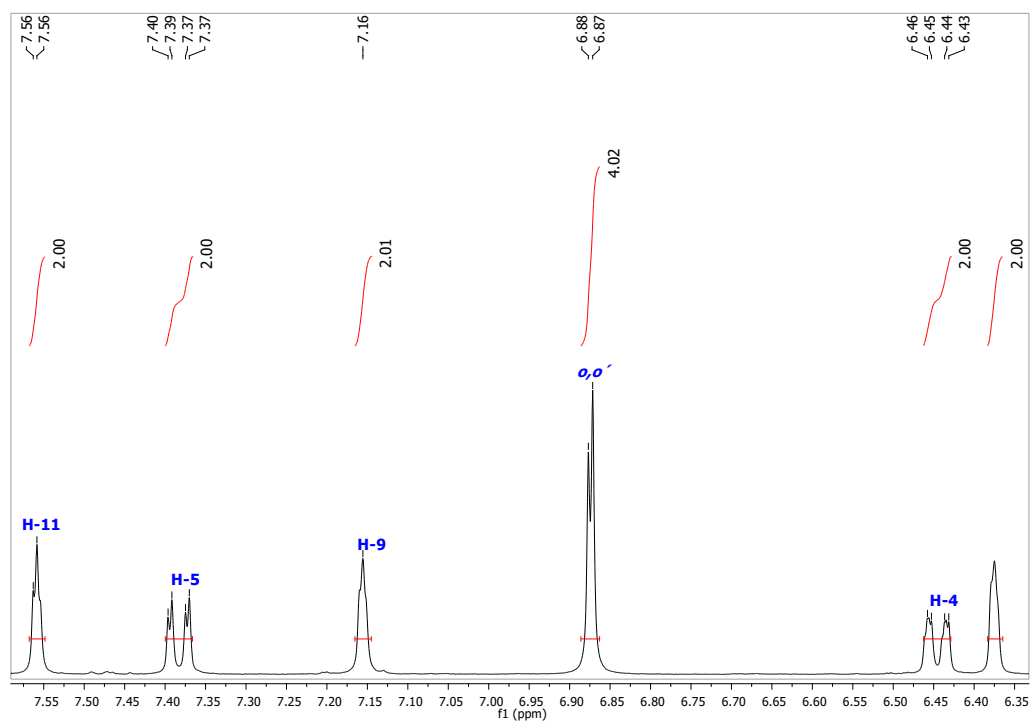

**Figure S17.** Integration spectra in DMSO- $d_6$  of **3**.

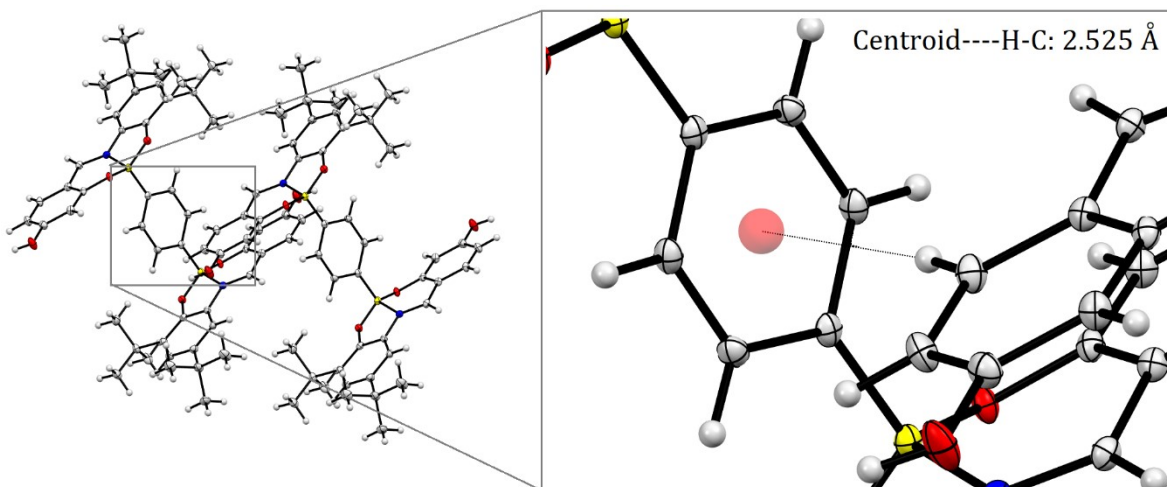

**Figure S18.** Intermolecular interactions of compound **3**.

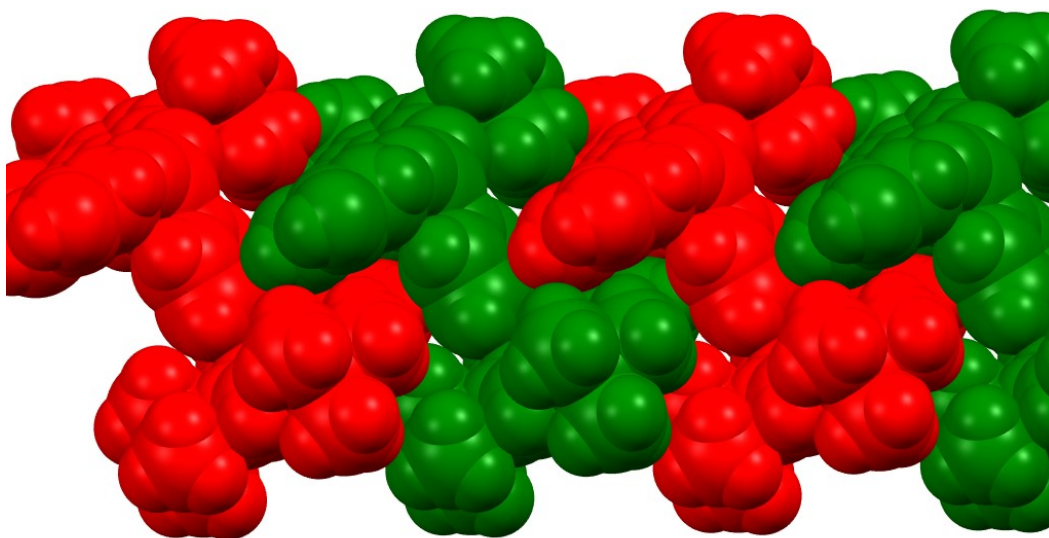

**Figure S19.** Space fill of compound **3**.

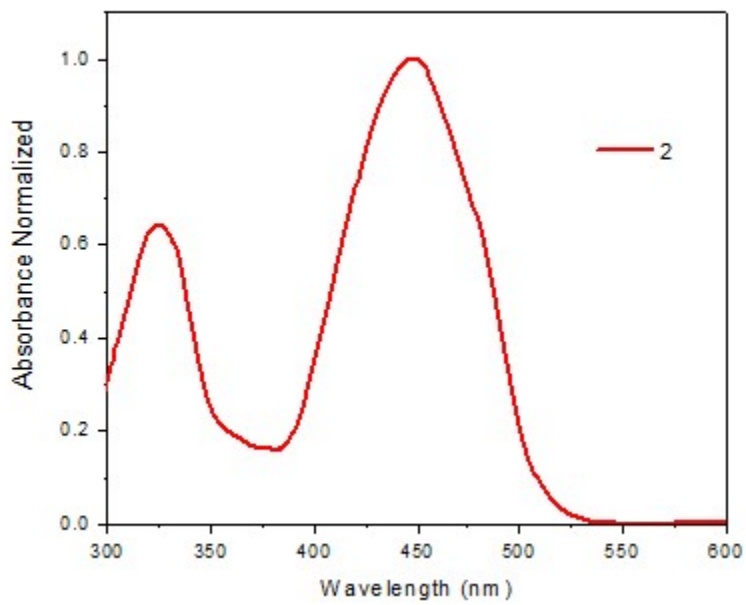

**Figure S20.** Absorbance of **3** in CHCl<sub>3</sub>.

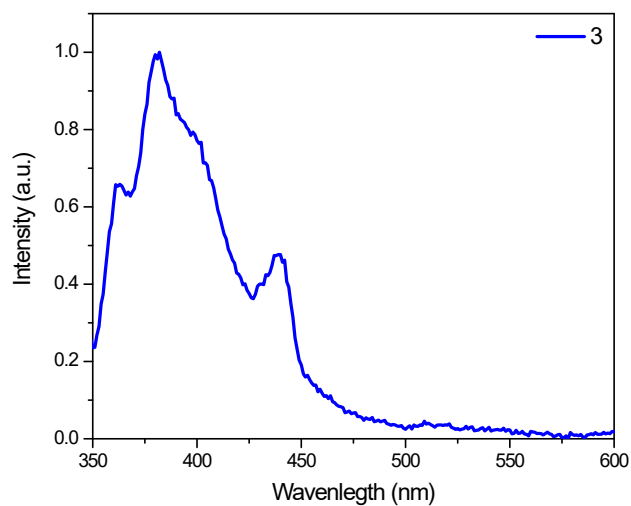

**Figure S21.** Emission spectra of **3** in  $\text{CHCl}_3$ .

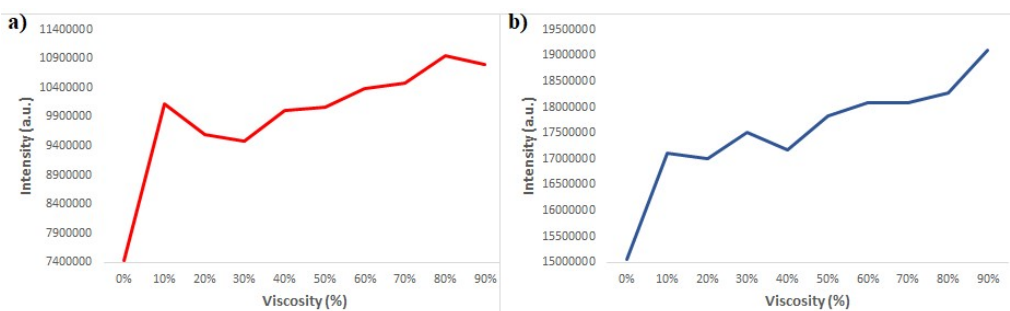

**Figure S22.** Emission spectra of **2**(a) and **3**(b) in mixtures of methanol/glycerol.

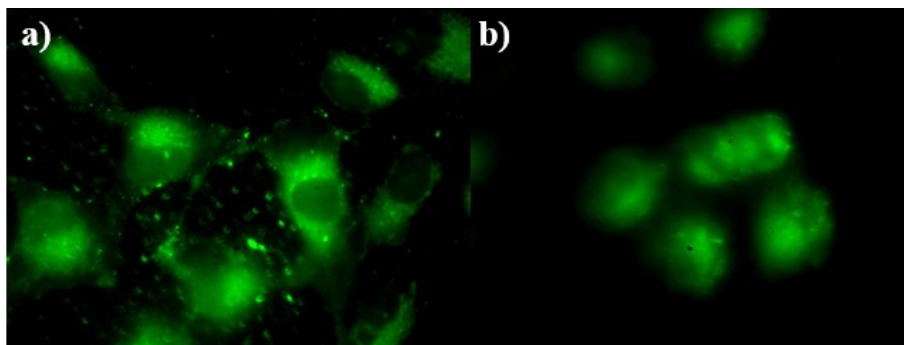

**Figure S23.** Fluorescence microscopy at 100X of magnification of **3** compound on HUVEC(a) and HeLa(b) cells.

**Table S1.** Computed structure of **2** calculated with the b3lyp/6-31g(d,p) functionals.

| Atomic |              |              |              |   |
|--------|--------------|--------------|--------------|---|
| Number |              | X            | Y            | X |
| 6      | -4.907028000 | -2.723404000 | -0.222048000 |   |
| 6      | -3.642360000 | -2.726607000 | 0.325053000  |   |
| 6      | -5.258890000 | -1.689427000 | -1.116253000 |   |
| 6      | -4.359583000 | -0.675314000 | -1.439728000 |   |
| 6      | -3.087582000 | -0.649507000 | -0.855743000 |   |
| 6      | -2.708772000 | -1.705985000 | 0.036314000  |   |
| 6      | -1.337849000 | -1.799610000 | 0.426920000  |   |
| 7      | -0.548812000 | -0.783061000 | 0.216245000  |   |
| 8      | -2.243944000 | 0.324720000  | -1.191159000 |   |
| 8      | 0.052315000  | 1.170525000  | -0.967063000 |   |
| 5      | -1.135132000 | 0.620223000  | -0.258926000 |   |
| 6      | -1.608438000 | 1.546263000  | 0.973604000  |   |
| 6      | -2.567643000 | 2.551448000  | 0.758935000  |   |
| 6      | -2.968829000 | 3.413543000  | 1.780212000  |   |
| 6      | -2.417268000 | 3.288395000  | 3.056541000  |   |
| 6      | -1.465022000 | 2.297405000  | 3.297936000  |   |
| 6      | -1.070206000 | 1.441959000  | 2.267405000  |   |
| 1      | -0.932414000 | -2.738321000 | 0.802725000  |   |
| 1      | -3.713038000 | 4.180924000  | 1.582436000  |   |
| 1      | -1.031639000 | 2.189514000  | 4.289054000  |   |
| 1      | -0.326498000 | 0.677627000  | 2.481788000  |   |
| 1      | -3.010441000 | 2.655638000  | -0.228612000 |   |
| 1      | -3.345950000 | -3.530723000 | 0.993379000  |   |
| 8      | -6.512158000 | -1.737262000 | -1.634372000 |   |
| 6      | 0.849353000  | -0.693254000 | 0.140912000  |   |
| 6      | 1.144411000  | 0.476974000  | -0.586328000 |   |
| 6      | 2.482789000  | 0.810979000  | -0.874865000 |   |

|   |             |              |              |
|---|-------------|--------------|--------------|
| 6 | 1.830590000 | -1.567706000 | 0.603857000  |
| 6 | 3.166635000 | -1.258702000 | 0.345609000  |
| 6 | 3.444327000 | -0.081411000 | -0.386582000 |
| 1 | 1.550013000 | -2.454175000 | 1.160457000  |
| 1 | 4.484462000 | 0.148378000  | -0.581337000 |
| 6 | 2.833792000 | 2.077734000  | -1.672361000 |
| 6 | 2.171104000 | 2.003545000  | -3.069741000 |
| 6 | 4.352686000 | 2.237757000  | -1.870040000 |
| 6 | 2.310973000 | 3.322961000  | -0.915466000 |
| 6 | 4.332390000 | -2.140957000 | 0.831703000  |
| 6 | 3.839545000 | -3.384829000 | 1.594903000  |
| 6 | 5.240052000 | -1.323280000 | 1.781092000  |
| 6 | 5.162478000 | -2.622360000 | -0.382169000 |
| 1 | 2.400972000 | 2.909798000  | -3.641697000 |
| 1 | 2.549420000 | 1.144137000  | -3.634033000 |
| 1 | 1.086484000 | 1.913584000  | -2.990534000 |
| 1 | 4.548452000 | 3.150820000  | -2.441048000 |
| 1 | 4.885154000 | 2.326728000  | -0.916987000 |
| 1 | 4.785512000 | 1.401581000  | -2.429928000 |
| 1 | 2.541826000 | 4.230560000  | -1.484849000 |
| 1 | 1.230921000 | 3.274962000  | -0.767674000 |
| 1 | 2.788662000 | 3.410158000  | 0.066339000  |
| 1 | 4.696775000 | -3.984508000 | 1.916944000  |
| 1 | 3.272415000 | -3.115132000 | 2.492092000  |
| 1 | 3.208661000 | -4.023928000 | 0.967856000  |
| 1 | 6.078188000 | -1.936204000 | 2.131789000  |
| 1 | 5.657352000 | -0.441373000 | 1.286367000  |
| 1 | 4.679898000 | -0.979614000 | 2.656733000  |
| 1 | 5.996501000 | -3.250793000 | -0.049952000 |
| 1 | 4.545873000 | -3.210774000 | -1.069381000 |

|   |              |              |              |
|---|--------------|--------------|--------------|
| 1 | 5.583020000  | -1.784969000 | -0.946339000 |
| 1 | -2.728543000 | 3.955425000  | 3.855978000  |
| 1 | -5.633493000 | -3.495479000 | 0.001626000  |
| 1 | -4.628501000 | 0.122080000  | -2.126344000 |
| 1 | -6.642329000 | -0.989120000 | -2.233205000 |

**Table S2.** Computed structure of **3** calculated with the b3lyp/6-31g(d,p) functionals.

| Atomic<br>Number |              | X            | Y            | X |
|------------------|--------------|--------------|--------------|---|
| 6                | 1.202986000  | -6.100135000 | -0.092719000 |   |
| 6                | 1.927618000  | -5.166608000 | 0.616387000  |   |
| 6                | 0.853785000  | -5.816233000 | -1.430257000 |   |
| 6                | 1.215155000  | -4.613088000 | -2.032944000 |   |
| 6                | 1.913363000  | -3.641941000 | -1.304908000 |   |
| 6                | 2.296764000  | -3.927917000 | 0.046468000  |   |
| 6                | 3.217573000  | -3.042301000 | 0.686346000  |   |
| 7                | 3.441110000  | -1.872687000 | 0.156731000  |   |
| 8                | 2.252484000  | -2.504665000 | -1.908161000 |   |
| 8                | 3.515389000  | -0.404575000 | -1.692797000 |   |
| 5                | 2.542764000  | -1.334403000 | -1.051494000 |   |
| 6                | 1.205910000  | -0.595590000 | -0.543095000 |   |
| 6                | 0.007889000  | -0.696538000 | -1.268075000 |   |
| 6                | -1.148411000 | -0.019626000 | -0.875039000 |   |
| 6                | -1.174412000 | 0.795418000  | 0.267731000  |   |
| 6                | 0.025521000  | 0.898068000  | 0.993251000  |   |
| 6                | 1.179812000  | 0.222030000  | 0.600943000  |   |
| 1                | 3.799145000  | -3.375297000 | 1.545301000  |   |
| 1                | -2.048248000 | -0.134395000 | -1.476754000 |   |
| 1                | 0.053780000  | 1.524680000  | 1.882204000  |   |

|   |              |              |              |
|---|--------------|--------------|--------------|
| 1 | 2.080677000  | 0.339295000  | 1.200550000  |
| 5 | -2.493332000 | 1.548790000  | 0.798663000  |
| 8 | -2.185596000 | 2.876402000  | 1.376683000  |
| 8 | -3.302402000 | 0.716431000  | 1.733801000  |
| 6 | -1.999851000 | 3.884246000  | 0.527226000  |
| 6 | -1.279598000 | 5.006876000  | 0.952703000  |
| 6 | -1.079370000 | 6.080754000  | 0.087802000  |
| 6 | -1.616248000 | 6.080840000  | -1.217491000 |
| 6 | -2.361360000 | 4.997050000  | -1.628937000 |
| 6 | -2.569898000 | 3.880800000  | -0.788556000 |
| 6 | -3.498184000 | 2.845826000  | -1.117641000 |
| 7 | -3.569428000 | 1.793491000  | -0.351362000 |
| 1 | -4.204821000 | 2.975742000  | -1.936573000 |
| 1 | -0.018465000 | -1.315650000 | -2.161870000 |
| 1 | 2.229414000  | -5.380808000 | 1.638241000  |
| 8 | -0.360595000 | 7.174818000  | 0.447781000  |
| 1 | -2.804367000 | 4.992726000  | -2.621374000 |
| 1 | -0.032972000 | -6.472133000 | -2.990261000 |
| 1 | 0.945676000  | -4.392057000 | -3.061676000 |
| 1 | 0.905460000  | -7.048125000 | 0.339328000  |
| 1 | -0.864786000 | 5.003059000  | 1.956456000  |
| 1 | -1.440412000 | 6.936165000  | -1.858865000 |
| 6 | -4.575119000 | 0.829107000  | -0.190574000 |
| 6 | -4.373448000 | 0.236448000  | 1.071991000  |
| 6 | -5.270706000 | -0.742983000 | 1.543433000  |
| 6 | -5.641919000 | 0.497675000  | -1.023442000 |
| 6 | -6.541408000 | -0.477570000 | -0.590533000 |
| 6 | -6.324740000 | -1.061079000 | 0.678989000  |
| 1 | -5.750660000 | 0.983940000  | -1.985940000 |
| 1 | -7.029790000 | -1.815581000 | 1.005645000  |



|   |              |              |              |
|---|--------------|--------------|--------------|
| 6 | -5.079335000 | -1.400926000 | 2.919649000  |
| 6 | -5.124668000 | -0.311894000 | 4.019374000  |
| 6 | -6.176474000 | -2.436812000 | 3.226853000  |
| 6 | -3.709607000 | -2.121504000 | 2.957979000  |
| 6 | -7.741996000 | -0.935488000 | -1.440209000 |
| 6 | -7.618670000 | -2.448244000 | -1.740964000 |
| 6 | -9.057056000 | -0.672447000 | -0.668500000 |
| 6 | -7.820045000 | -0.186920000 | -2.784287000 |
| 6 | 4.508049000  | -0.975722000 | 0.313289000  |
| 6 | 4.510579000  | -0.142459000 | -0.823084000 |
| 6 | 5.512161000  | 0.837043000  | -0.978018000 |
| 6 | 5.467206000  | -0.888993000 | 1.320141000  |
| 6 | 6.466459000  | 0.078092000  | 1.201716000  |
| 6 | 6.454295000  | 0.905365000  | 0.055334000  |
| 1 | 5.418694000  | -1.553581000 | 2.174745000  |
| 1 | 7.234296000  | 1.652334000  | -0.027195000 |
| 6 | 5.542058000  | 1.756155000  | -2.210189000 |
| 6 | 5.685546000  | 0.894587000  | -3.488600000 |
| 6 | 6.718533000  | 2.748700000  | -2.166750000 |
| 6 | 4.226613000  | 2.569694000  | -2.277571000 |
| 6 | 7.563192000  | 0.271174000  | 2.266219000  |
| 6 | 7.483817000  | 1.705315000  | 2.841342000  |
| 6 | 8.954604000  | 0.052573000  | 1.625805000  |
| 6 | 7.416110000  | -0.720097000 | 3.436388000  |
| 1 | -4.974031000 | -0.767875000 | 5.004656000  |
| 1 | -4.349015000 | 0.440421000  | 3.866812000  |
| 1 | -6.097434000 | 0.192073000  | 4.027051000  |
| 1 | -5.996048000 | -2.872361000 | 4.214783000  |
| 1 | -7.174793000 | -1.986331000 | 3.244239000  |
| 1 | -6.181771000 | -3.258354000 | 2.502399000  |

|   |              |              |              |
|---|--------------|--------------|--------------|
| 1 | -3.553251000 | -2.575701000 | 3.943283000  |
| 1 | -3.669886000 | -2.919378000 | 2.208553000  |
| 1 | -2.889872000 | -1.428048000 | 2.763576000  |
| 1 | -8.470073000 | -2.790540000 | -2.340279000 |
| 1 | -6.701345000 | -2.661746000 | -2.299150000 |
| 1 | -7.596486000 | -3.044568000 | -0.824365000 |
| 1 | -9.919746000 | -1.001514000 | -1.259043000 |
| 1 | -9.084227000 | -1.207737000 | 0.284889000  |
| 1 | -9.178084000 | 0.394611000  | -0.455045000 |
| 1 | -8.684665000 | -0.539996000 | -3.355237000 |
| 1 | -7.938189000 | 0.892783000  | -2.643249000 |
| 1 | -6.929108000 | -0.358221000 | -3.397594000 |
| 1 | 5.688082000  | 1.538209000  | -4.375765000 |
| 1 | 6.627006000  | 0.334518000  | -3.476090000 |
| 1 | 4.862922000  | 0.183696000  | -3.582267000 |
| 1 | 6.695370000  | 3.376459000  | -3.063257000 |
| 1 | 6.663462000  | 3.414728000  | -1.298804000 |
| 1 | 7.687789000  | 2.238605000  | -2.148228000 |
| 1 | 4.230548000  | 3.214090000  | -3.164245000 |
| 1 | 3.355604000  | 1.914762000  | -2.330836000 |
| 1 | 4.120855000  | 3.210817000  | -1.395739000 |
| 1 | 8.263639000  | 1.858916000  | 3.595991000  |
| 1 | 7.619254000  | 2.463571000  | 2.064789000  |
| 1 | 6.512679000  | 1.883238000  | 3.314552000  |
| 1 | 9.745704000  | 0.193396000  | 2.371113000  |
| 1 | 9.044140000  | -0.961187000 | 1.222017000  |
| 1 | 9.141210000  | 0.753904000  | 0.807491000  |
| 1 | 8.213003000  | -0.550908000 | 4.167613000  |
| 1 | 6.460857000  | -0.596558000 | 3.957485000  |
| 1 | 7.493420000  | -1.759981000 | 3.101373000  |

|   |              |              |              |
|---|--------------|--------------|--------------|
| 8 | 0.149007000  | -6.771714000 | -2.089024000 |
| 1 | -0.043807000 | 7.066395000  | 1.354990000  |

**Table S3.** Electronic transitions for **2–3** calculated using the B3LYP/6-31G (d,p) method.

| <b>Comp.</b> | <b>Transition</b>              | <b>MO Contribution</b> | <b>Energy gap<br/>[eV] ([nm])</b> | <b>Oscillator<br/>Strength(f)</b> |
|--------------|--------------------------------|------------------------|-----------------------------------|-----------------------------------|
| <b>2</b>     | S <sub>0</sub> -S <sub>1</sub> | HOMO→LUMO              | 2.717 (456)                       | 0.2753                            |
| <b>3</b>     | S <sub>0</sub> -S <sub>1</sub> | HOMO-<br>1→LUMO+1      | 2.670 (464)                       | 0.0196                            |
|              |                                | HOMO→LUMO              |                                   |                                   |
|              |                                | HOMO→LUMO+1            |                                   |                                   |
